# Supplementary material
Source: ML conference proceedings conference paper supplement (https://proceedings.mlr.press/v85/hegselmann18a.html)
Supplement: Supplementary file [file hegselmann18a-supp.pdf]

Appendix A. - Study Flow Diagram

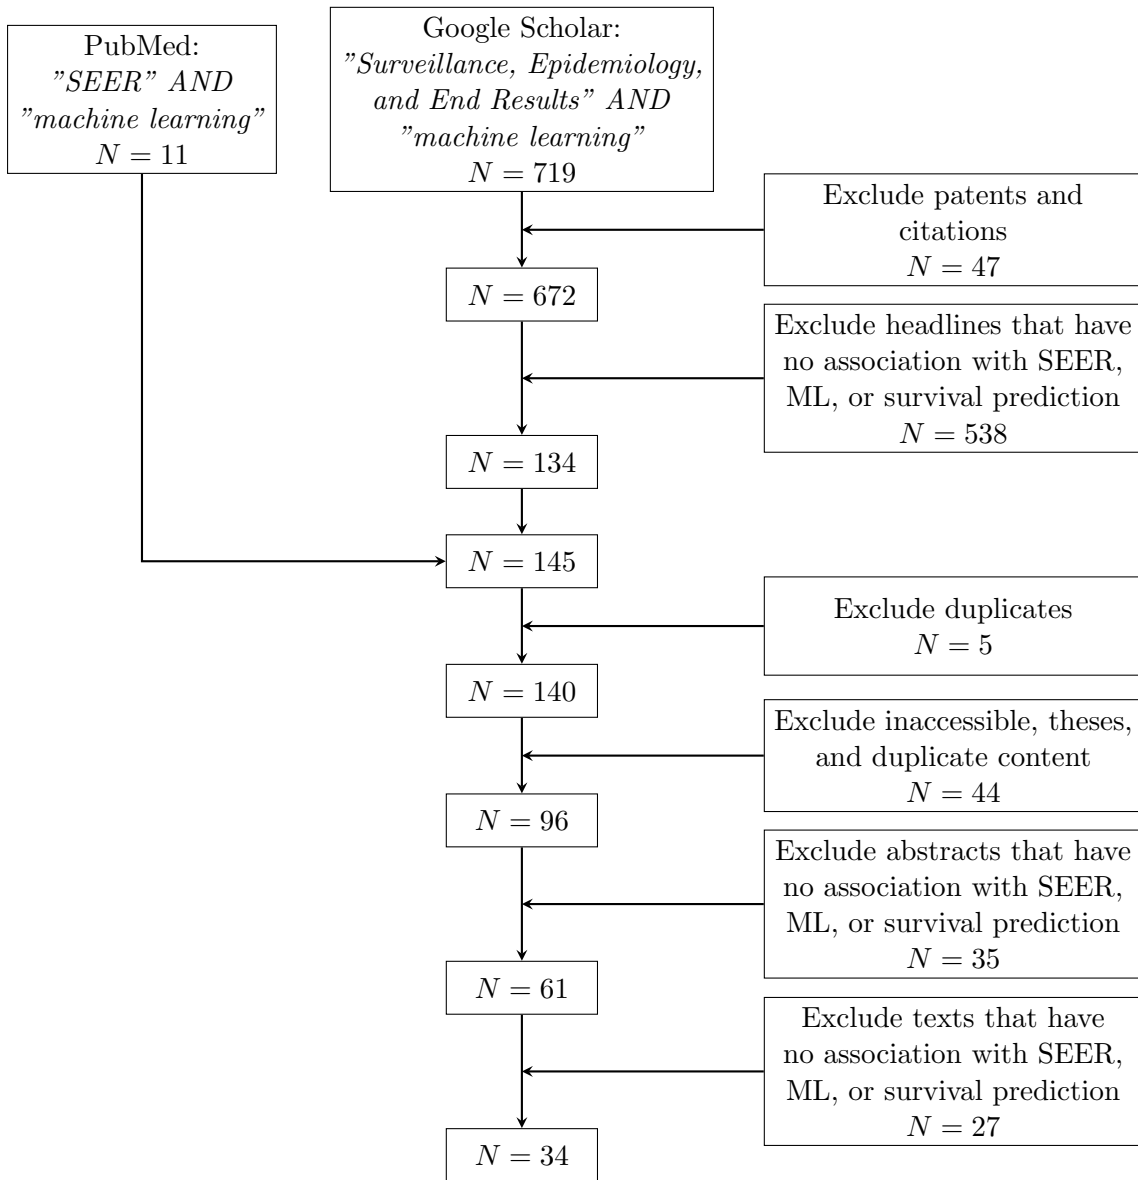

Figure 3: Inclusion and exclusion criteria for literature review to identify studies applying machine learning for survival prediction with SEER cancer data.

**Appendix B. - Model Categories for Literature Review**

1-NN - 1-nearest neighbor  
ANFIS - Adaptive neuro fuzzy inference system  
BAG - Bagging  
BN - Bayesian (belief) network  
BOO - Boosting  
CFS - Correlation-based feature selection  
Co-train - Co-training  
DSO - Density-based synthetic oversampling  
DT - Decision tree (including variants)  
EV - (Ensemble) voting  
GBM - Gradient boosting machine  
HC - Hierarchical clustering  
InfoGain - Information gain  
k-means - k-means clustering  
k-NN - k-nearest neighbor  
MBC - Model-based clustering  
MLP - Multilayer perceptron  
NB - Naives Bayes  
NNMF - Non-negative matrix factorization  
LinR - Linear regression  
LogR - Logistic regression  
PCA - Principal component analysis  
PSO - Particle swarm optimization  
RF - Random forest SMOTE - Synthetic minority oversampling technique  
SSL - Semi-supervised learning  
SOM - Self-ordering maps  
ST - Stacking  
SVM - Support vector machine

## Appendix C. - Input Attributes Overview

Table 4: Input attributes for breast cancer 1-year survival prediction (270,107 cases).

| Column                                   | Minimum | Maximum | Mean     | Std      | Values | Empty  | Status      |
|------------------------------------------|---------|---------|----------|----------|--------|--------|-------------|
| Age at diagnosis                         | 10      | 99      | 60.07    | 13.97    | 88     | 0      | continuous  |
| Age recode <1 year olds                  | 3       | 18      | 12.6     | 2.77     | 16     | 0      | continuous  |
| CS Tumor size                            | 0       | 999     | 96.84    | 258.39   | 241    | 0      | continuous  |
| EOD 10 - number of lymph nodes examined  | 0       | 99      | 9.29     | 16.35    | 79     | 0      | continuous  |
| EOD 10 - positive lymph nodes examined   | 0       | 99      | 13.97    | 32.68    | 66     | 0      | continuous  |
| Year of birth                            | 1904    | 1998    | 1945.98  | 14.06    | 92     | 0      | continuous  |
| Year of diagnosis                        | 2004    | 2009    | 2006.56  | 1.71     | 6      | 0      | continuous  |
| Adjusted AJCC 6th M (1988+)              | 0       | 99      | 3.36     | 16.67    | 4      | 0      | categorical |
| Adjusted AJCC 6th N (1988+)              | 0       | 99      | 11.15    | 24.34    | 6      | 0      | categorical |
| Adjusted AJCC 6th Stage (1988+)          | 0       | 99      | 30.37    | 24       | 11     | 0      | categorical |
| Adjusted AJCC 6th T (1988+)              | 0       | 99      | 25.37    | 20.66    | 15     | 0      | categorical |
| AYA site recode/WHO 2008                 | 13      | 56      | 36.19    | 1.99     | 11     | 0      | categorical |
| Behavior Code ICD-O-2                    | 0       | 3       | 3        | 0.02     | 3      | 0      | categorical |
| Broad Histology recode                   | 0       | 39      | 8.73     | 1.61     | 26     | 0      | categorical |
| CS Extension                             | 50      | 999     | 153.04   | 179.35   | 40     | 0      | categorical |
| CS Lymph Nodes                           | 0       | 999     | 153.29   | 255.75   | 39     | 0      | categorical |
| CS Mets at DX                            | 0       | 99      | 4.9      | 18.53    | 9      | 0      | categorical |
| CS Site-Specific Factor 1                | 10      | 999     | 84.01    | 256.29   | 7      | 0      | categorical |
| CS Site-Specific Factor 2                | 10      | 999     | 94.06    | 270.1    | 7      | 0      | categorical |
| CS Site-Specific Factor 3                | 0       | 99      | 15.78    | 34.57    | 68     | 0      | categorical |
| CS Site-Specific Factor 4                | 0       | 987     | 372.2    | 478.1    | 5      | 0      | categorical |
| CS Site-Specific Factor 5                | 0       | 987     | 371.99   | 478.26   | 4      | 0      | categorical |
| CS Site-Specific Factor 6                | 0       | 987     | 64.66    | 209.21   | 8      | 0      | categorical |
| CS Version Input Current                 | 20510   | 20550   | 20514.53 | 9.83     | 5      | 0      | categorical |
| CS Version Input Original                | 937     | 20550   | 10455.66 | 1307.25  | 17     | 0      | categorical |
| Derived AJCC M                           | 0       | 99      | 3.39     | 16.67    | 4      | 0      | categorical |
| Derived AJCC N                           | 0       | 99      | 9.53     | 19.67    | 20     | 0      | categorical |
| Derived AJCC Stage Group                 | 0       | 99      | 30.42    | 24.06    | 11     | 0      | categorical |
| Derived AJCC T                           | 0       | 99      | 23.44    | 18.56    | 16     | 0      | categorical |
| Derived SS1977                           | 1       | 9       | 2.13     | 1.79     | 6      | 0      | categorical |
| Derived SS2000                           | 1       | 9       | 2.12     | 1.78     | 6      | 0      | categorical |
| ER Status Recode Breast Cancer (1990+)   | 1       | 4       | 1.42     | 0.83     | 4      | 0      | categorical |
| Grade                                    | 1       | 9       | 2.75     | 2.03     | 5      | 0      | categorical |
| Histologic Type ICD-O-2                  | 8000    | 9580    | 8483.67  | 98.94    | 116    | 0      | categorical |
| Histologic Type ICD-O-3                  | 8000    | 9580    | 8486.61  | 94.57    | 132    | 0      | categorical |
| Historic SSG 2000 Stage                  | 1       | 9       | 1.77     | 1.64     | 4      | 0      | categorical |
| ICCC site rec extended ICD-O-3/ WHO 2008 | 21      | 999     | 104.75   | 49.06    | 20     | 0      | categorical |
| ICCC site recode ICD-O-3/WHO 2008        | 33      | 999     | 118.68   | 48.29    | 12     | 0      | categorical |
| IHS link                                 | -1      | 1       | 0        | 0.06     | 3      | 287    | categorical |
| Insurance Recode (2007+)                 | -1      | 5       | 1.1      | 2.09     | 6      | 130628 | categorical |
| Laterality                               | 1       | 9       | 1.55     | 0.76     | 5      | 0      | categorical |
| Marital status at diagnosis              | 1       | 9       | 2.83     | 1.81     | 7      | 0      | categorical |
| Month of diagnosis                       | 1       | 12      | 6.47     | 3.43     | 12     | 0      | categorical |
| NHIA Derived Hisp Origin                 | 0       | 8       | 0.45     | 1.55     | 9      | 0      | categorical |
| Origin Recode NHIA                       | 0       | 1       | 0.1      | 0.3      | 2      | 0      | categorical |
| PR Status Recode Breast Cancer (1990+)   | 1       | 4       | 1.56     | 0.87     | 4      | 0      | categorical |
| Race recode A                            | 1       | 9       | 1.31     | 0.82     | 4      | 0      | categorical |
| Race recode Y                            | 1       | 9       | 1.38     | 0.99     | 5      | 0      | categorical |
| Race/ethnicity                           | 1       | 99      | 2.92     | 11.58    | 30     | 0      | categorical |
| Recode ICD-O-2 to 10                     | -1      | 9999    | -0.67    | 57.72    | 2      | 270098 | categorical |
| Recode ICD-O-2 to 9                      | 175     | 9999    | 1738.41  | 116.37   | 19     | 0      | categorical |
| SEER historic stage A                    | 1       | 9       | 1.64     | 1.25     | 4      | 0      | categorical |
| SEER registry                            | 1501    | 1547    | 1532.56  | 13.45    | 18     | 0      | categorical |
| Sex                                      | 1       | 2       | 1.99     | 0.08     | 2      | 0      | categorical |
| State-county recode                      | 2900    | 53073   | 17874.25 | 14081.77 | 614    | 0      | categorical |
| Type of reporting source                 | 1       | 8       | 1.12     | 0.78     | 6      | 0      | categorical |
| Survived cancer for 12 months            | 0       | 1       | 0.97     | 0.17     | 2      | 0      | target      |

Table 5: Input attributes for breast cancer 5-year survival prediction (248,751 cases).

| Column                                   | Minimum | Maximum | Mean     | Std      | Values | Empty  | Status      |
|------------------------------------------|---------|---------|----------|----------|--------|--------|-------------|
| Age at diagnosis                         | 10      | 99      | 59.35    | 13.54    | 88     | 0      | continuous  |
| Age recode <1 year olds                  | 3       | 18      | 12.46    | 2.7      | 16     | 0      | continuous  |
| CS Tumor size                            | 0       | 999     | 96.49    | 257.97   | 237    | 0      | continuous  |
| EOD 10 - number of lymph nodes examined  | 0       | 99      | 9.34     | 16.32    | 79     | 0      | continuous  |
| EOD 10 - positive lymph nodes examined   | 0       | 99      | 13.15    | 31.76    | 66     | 0      | continuous  |
| Year of birth                            | 1904    | 1998    | 1946.68  | 13.61    | 92     | 0      | continuous  |
| Year of diagnosis                        | 2004    | 2009    | 2006.53  | 1.7      | 6      | 0      | continuous  |
| Adjusted AJCC 6th M (1988+)              | 0       | 99      | 3.24     | 16.26    | 4      | 0      | categorical |
| Adjusted AJCC 6th N (1988+)              | 0       | 99      | 11       | 24       | 6      | 0      | categorical |
| Adjusted AJCC 6th Stage (1988+)          | 0       | 99      | 30.24    | 23.82    | 11     | 0      | categorical |
| Adjusted AJCC 6th T (1988+)              | 0       | 99      | 25.21    | 20.39    | 15     | 0      | categorical |
| AYA site recode/WHO 2008                 | 13      | 56      | 36.19    | 1.99     | 11     | 0      | categorical |
| Behavior Code ICD-O-2                    | 0       | 3       | 3        | 0.02     | 3      | 0      | categorical |
| Broad Histology recode                   | 0       | 39      | 8.73     | 1.61     | 26     | 0      | categorical |
| CS Extension                             | 50      | 999     | 152.45   | 178.48   | 40     | 0      | categorical |
| CS Lymph Nodes                           | 0       | 999     | 153.29   | 254.51   | 39     | 0      | categorical |
| CS Mets at DX                            | 0       | 99      | 4.85     | 18.27    | 9      | 0      | categorical |
| CS Site-Specific Factor 1                | 10      | 999     | 82.56    | 253.86   | 7      | 0      | categorical |
| CS Site-Specific Factor 2                | 10      | 999     | 92.82    | 268.17   | 7      | 0      | categorical |
| CS Site-Specific Factor 3                | 0       | 99      | 14.96    | 33.74    | 68     | 0      | categorical |
| CS Site-Specific Factor 4                | 0       | 987     | 374.43   | 478.66   | 5      | 0      | categorical |
| CS Site-Specific Factor 5                | 0       | 987     | 374.22   | 478.82   | 4      | 0      | categorical |
| CS Site-Specific Factor 6                | 0       | 987     | 64.73    | 209.07   | 8      | 0      | categorical |
| CS Version Input Current                 | 20510   | 20550   | 20514.42 | 9.69     | 5      | 0      | categorical |
| CS Version Input Original                | 937     | 20550   | 10445.79 | 1276.85  | 17     | 0      | categorical |
| Derived AJCC M                           | 0       | 99      | 3.27     | 16.27    | 4      | 0      | categorical |
| Derived AJCC N                           | 0       | 99      | 9.46     | 19.41    | 20     | 0      | categorical |
| Derived AJCC Stage Group                 | 0       | 99      | 30.28    | 23.88    | 11     | 0      | categorical |
| Derived AJCC T                           | 0       | 99      | 23.35    | 18.42    | 16     | 0      | categorical |
| Derived SS1977                           | 1       | 9       | 2.13     | 1.79     | 6      | 0      | categorical |
| Derived SS2000                           | 1       | 9       | 2.13     | 1.78     | 6      | 0      | categorical |
| ER Status Recode Breast Cancer (1990+)   | 1       | 4       | 1.42     | 0.82     | 4      | 0      | categorical |
| Grade                                    | 1       | 9       | 2.74     | 2.03     | 5      | 0      | categorical |
| Histologic Type ICD-O-2                  | 8000    | 9580    | 8483.79  | 98.71    | 114    | 0      | categorical |
| Histologic Type ICD-O-3                  | 8000    | 9580    | 8486.66  | 94.45    | 130    | 0      | categorical |
| Historic SSG 2000 Stage                  | 1       | 9       | 1.78     | 1.64     | 4      | 0      | categorical |
| ICCC site rec extended ICD-O-3/ WHO 2008 | 21      | 999     | 104.72   | 48.77    | 20     | 0      | categorical |
| ICCC site recode ICD-O-3/WHO 2008        | 33      | 999     | 118.65   | 48       | 12     | 0      | categorical |
| IHS link                                 | -1      | 1       | 0        | 0.06     | 3      | 266    | categorical |
| Insurance Recode (2007+)                 | -1      | 5       | 1.07     | 2.09     | 6      | 122081 | categorical |
| Laterality                               | 1       | 9       | 1.55     | 0.77     | 5      | 0      | categorical |
| Marital status at diagnosis              | 1       | 9       | 2.79     | 1.78     | 7      | 0      | categorical |
| Month of diagnosis                       | 1       | 12      | 6.45     | 3.43     | 12     | 0      | categorical |
| NHIA Derived Hisp Origin                 | 0       | 8       | 0.45     | 1.55     | 9      | 0      | categorical |
| Origin Recode NHIA                       | 0       | 1       | 0.1      | 0.3      | 2      | 0      | categorical |
| PR Status Recode Breast Cancer (1990+)   | 1       | 4       | 1.56     | 0.86     | 4      | 0      | categorical |
| Race recode A                            | 1       | 9       | 1.31     | 0.81     | 4      | 0      | categorical |
| Race recode Y                            | 1       | 9       | 1.38     | 0.99     | 5      | 0      | categorical |
| Race/ethnicity                           | 1       | 99      | 2.92     | 11.57    | 30     | 0      | categorical |
| Recode ICD-O-2 to 10                     | -1      | 9999    | -0.64    | 60.15    | 2      | 248742 | categorical |
| Recode ICD-O-2 to 9                      | 175     | 9999    | 1738.82  | 114.57   | 19     | 0      | categorical |
| SEER historic stage A                    | 1       | 9       | 1.64     | 1.23     | 4      | 0      | categorical |
| SEER registry                            | 1501    | 1547    | 1532.49  | 13.46    | 18     | 0      | categorical |
| Sex                                      | 1       | 2       | 1.99     | 0.08     | 2      | 0      | categorical |
| State-county recode                      | 2900    | 53073   | 17840.35 | 14106.57 | 614    | 0      | categorical |
| Type of reporting source                 | 1       | 8       | 1.12     | 0.77     | 6      | 0      | categorical |
| Survived cancer for 60 months            | 0       | 1       | 0.87     | 0.33     | 2      | 0      | target      |

Table 6: Input attributes for lung cancer 1-year survival prediction (215,630 cases).

| Column                                   | Minimum | Maximum | Mean     | Std     | Values | Empty  | Status      |
|------------------------------------------|---------|---------|----------|---------|--------|--------|-------------|
| Age at diagnosis                         | 0       | 99      | 68.24    | 11.57   | 98     | 0      | continuous  |
| Age recode <1 year olds                  | 0       | 18      | 14.23    | 2.29    | 19     | 0      | continuous  |
| CS Tumor size                            | 0       | 999     | 327.69   | 437.19  | 283    | 0      | continuous  |
| EOD 10 - number of lymph nodes examined  | 0       | 99      | 11.15    | 28.92   | 86     | 0      | continuous  |
| EOD 10 - positive lymph nodes examined   | 0       | 99      | 76.83    | 40.09   | 36     | 0      | continuous  |
| Year of birth                            | 1904    | 2007    | 1937.75  | 11.68   | 101    | 0      | continuous  |
| Year of diagnosis                        | 2004    | 2009    | 2006.5   | 1.71    | 6      | 0      | continuous  |
| AYA site recode/WHO 2008                 | 13      | 56      | 36.15    | 4.85    | 17     | 0      | categorical |
| Behavior Code ICD-O-2                    | 0       | 3       | 3        | 0.02    | 3      | 0      | categorical |
| Broad Histology recode                   | 0       | 39      | 2.76     | 2.31    | 31     | 0      | categorical |
| CS Extension                             | 100     | 999     | 518.96   | 313.5   | 48     | 0      | categorical |
| CS Lymph Nodes                           | 0       | 999     | 276.64   | 331.83  | 7      | 0      | categorical |
| CS Mets at DX                            | 0       | 99      | 25.62    | 29.12   | 28     | 0      | categorical |
| CS Site-Specific Factor 1                | 0       | 999     | 964.6    | 154.43  | 7      | 0      | categorical |
| CS Version Input Current                 | 20510   | 20550   | 20512.62 | 6.05    | 5      | 0      | categorical |
| CS Version Input Original                | 937     | 20550   | 10551.98 | 1619.7  | 17     | 0      | categorical |
| Derived AJCC M                           | 0       | 99      | 13.74    | 27.55   | 4      | 0      | categorical |
| Derived AJCC N                           | 0       | 99      | 25       | 31.55   | 6      | 0      | categorical |
| Derived AJCC Stage Group                 | 12      | 99      | 58.43    | 24.34   | 10     | 0      | categorical |
| Derived AJCC T                           | 0       | 99      | 39.93    | 29.05   | 7      | 0      | categorical |
| Derived SS1977                           | 1       | 9       | 5.28     | 2.59    | 6      | 0      | categorical |
| Derived SS2000                           | 1       | 9       | 5.31     | 2.56    | 6      | 0      | categorical |
| First malignant primary indicator        | 0       | 1       | 1        | 0       | 2      | 0      | categorical |
| Grade                                    | 1       | 9       | 6.11     | 3.21    | 5      | 0      | categorical |
| Histologic Type ICD-O-2                  | 8000    | 9581    | 8090.01  | 103.02  | 127    | 0      | categorical |
| Histologic Type ICD-O-3                  | 8000    | 9581    | 8096.95  | 100.61  | 148    | 0      | categorical |
| Historic SSG 2000 Stage                  | 1       | 9       | 5.09     | 2.76    | 4      | 0      | categorical |
| ICCC site rec extended ICD-O-3/ WHO 2008 | 21      | 999     | 100.73   | 4.88    | 34     | 0      | categorical |
| ICCC site recode ICD-O-3/WHO 2008        | 33      | 999     | 116.31   | 3.73    | 17     | 0      | categorical |
| IHS link                                 | -1      | 1       | 0        | 0.06    | 3      | 299    | categorical |
| Insurance Recode (2007+)                 | -1      | 5       | 1.05     | 2.12    | 6      | 107475 | categorical |
| Laterality                               | 0       | 9       | 1.88     | 1.82    | 6      | 0      | categorical |
| Marital status at diagnosis              | 1       | 9       | 2.97     | 1.77    | 6      | 0      | categorical |
| Month of diagnosis                       | 1       | 12      | 6.38     | 3.43    | 12     | 0      | categorical |
| NHIA Derived Hisp Origin                 | 0       | 8       | 0.24     | 1.15    | 9      | 0      | categorical |
| Origin Recode NHIA                       | 0       | 1       | 0.05     | 0.23    | 2      | 0      | categorical |
| Primary by International Rules           | 0       | 1       | 1        | 0       | 2      | 0      | categorical |
| Race recode A                            | 1       | 9       | 1.24     | 0.64    | 4      | 0      | categorical |
| Race recode Y                            | 1       | 9       | 1.3      | 0.81    | 5      | 0      | categorical |
| Race/ethnicity                           | 1       | 99      | 1.94     | 7.15    | 29     | 0      | categorical |
| Recode ICD-O-2 to 10                     | -1      | 9999    | -0.4     | 77.64   | 2      | 215617 | categorical |
| Recode ICD-O-2 to 9                      | 193     | 9999    | 1625.12  | 67.67   | 15     | 0      | categorical |
| SEER historic stage A                    | 1       | 9       | 3.32     | 1.83    | 4      | 0      | categorical |
| SEER registry                            | 1501    | 1547    | 1533.49  | 13.31   | 18     | 0      | categorical |
| Sex                                      | 1       | 2       | 1.47     | 0.5     | 2      | 0      | categorical |
| State-county recode                      | 2900    | 53073   | 18313.01 | 13210.1 | 614    | 0      | categorical |
| Type of reporting source                 | 1       | 8       | 1.15     | 0.76    | 6      | 0      | categorical |
| Survived cancer for 12 months            | 0       | 1       | 0.44     | 0.5     | 2      | 0      | target      |

Table 7: Input attributes for lung cancer 5-year survival prediction (205,554 cases).

| Column                                   | Minimum | Maximum | Mean     | Std      | Values | Empty  | Status      |
|------------------------------------------|---------|---------|----------|----------|--------|--------|-------------|
| Age at diagnosis                         | 0       | 99      | 68.11    | 11.58    | 98     | 0      | continuous  |
| Age recode <1 year olds                  | 0       | 18      | 14.2     | 2.29     | 19     | 0      | continuous  |
| CS Tumor size                            | 0       | 999     | 334.17   | 439.59   | 281    | 0      | continuous  |
| EOD 10 - number of lymph nodes examined  | 0       | 99      | 11.12    | 28.98    | 85     | 0      | continuous  |
| EOD 10 - positive lymph nodes examined   | 0       | 99      | 77.57    | 39.56    | 35     | 0      | continuous  |
| Year of birth                            | 1904    | 2007    | 1937.87  | 11.69    | 101    | 0      | continuous  |
| Year of diagnosis                        | 2004    | 2009    | 2006.5   | 1.71     | 6      | 0      | continuous  |
| AYA site recode/WHO 2008                 | 13      | 56      | 36.15    | 4.84     | 17     | 0      | categorical |
| Behavior Code ICD-O-2                    | 0       | 3       | 3        | 0.02     | 3      | 0      | categorical |
| Broad Histology recode                   | 0       | 39      | 2.75     | 2.31     | 31     | 0      | categorical |
| CS Extension                             | 100     | 999     | 526.12   | 312.05   | 48     | 0      | categorical |
| CS Lymph Nodes                           | 0       | 999     | 282.23   | 332.69   | 7      | 0      | categorical |
| CS Mets at DX                            | 0       | 99      | 26.28    | 29.07    | 28     | 0      | categorical |
| CS Site-Specific Factor 1                | 0       | 999     | 965.08   | 152.95   | 7      | 0      | categorical |
| CS Version Input Current                 | 20510   | 20550   | 20512.61 | 6.04     | 5      | 0      | categorical |
| CS Version Input Original                | 937     | 20550   | 10549.43 | 1613.83  | 17     | 0      | categorical |
| Derived AJCC M                           | 0       | 99      | 13.92    | 27.55    | 4      | 0      | categorical |
| Derived AJCC N                           | 0       | 99      | 25.42    | 31.6     | 6      | 0      | categorical |
| Derived AJCC Stage Group                 | 12      | 99      | 59.21    | 23.81    | 10     | 0      | categorical |
| Derived AJCC T                           | 0       | 99      | 40.35    | 29.02    | 7      | 0      | categorical |
| Derived SS1977                           | 1       | 9       | 5.37     | 2.55     | 6      | 0      | categorical |
| Derived SS2000                           | 1       | 9       | 5.4      | 2.51     | 6      | 0      | categorical |
| First malignant primary indicator        | 0       | 1       | 1        | 0        | 2      | 0      | categorical |
| Grade                                    | 1       | 9       | 6.14     | 3.2      | 5      | 0      | categorical |
| Histologic Type ICD-O-2                  | 8000    | 9581    | 8089.43  | 102.64   | 127    | 0      | categorical |
| Histologic Type ICD-O-3                  | 8000    | 9581    | 8096.4   | 100.2    | 148    | 0      | categorical |
| Historic SSG 2000 Stage                  | 1       | 9       | 5.18     | 2.72     | 4      | 0      | categorical |
| ICCC site rec extended ICD-O-3/ WHO 2008 | 21      | 999     | 100.73   | 4.94     | 34     | 0      | categorical |
| ICCC site recode ICD-O-3/WHO 2008        | 33      | 999     | 116.31   | 3.8      | 17     | 0      | categorical |
| IHS link                                 | -1      | 1       | 0        | 0.06     | 3      | 288    | categorical |
| Insurance Recode (2007+)                 | -1      | 5       | 1.04     | 2.12     | 6      | 102909 | categorical |
| Laterality                               | 0       | 9       | 1.89     | 1.84     | 6      | 0      | categorical |
| Marital status at diagnosis              | 1       | 9       | 2.96     | 1.77     | 6      | 0      | categorical |
| Month of diagnosis                       | 1       | 12      | 6.38     | 3.43     | 12     | 0      | categorical |
| NHIA Derived Hisp Origin                 | 0       | 8       | 0.24     | 1.15     | 9      | 0      | categorical |
| Origin Recode NHIA                       | 0       | 1       | 0.05     | 0.23     | 2      | 0      | categorical |
| Primary by International Rules           | 0       | 1       | 1        | 0        | 2      | 0      | categorical |
| Race recode A                            | 1       | 9       | 1.25     | 0.64     | 4      | 0      | categorical |
| Race recode Y                            | 1       | 9       | 1.3      | 0.81     | 5      | 0      | categorical |
| Race/ethnicity                           | 1       | 99      | 1.94     | 7.15     | 29     | 0      | categorical |
| Recode ICD-O-2 to 10                     | -1      | 9999    | -0.37    | 79.52    | 2      | 205541 | categorical |
| Recode ICD-O-2 to 9                      | 193     | 9999    | 1625.17  | 69.3     | 15     | 0      | categorical |
| SEER historic stage A                    | 1       | 9       | 3.37     | 1.81     | 4      | 0      | categorical |
| SEER registry                            | 1501    | 1547    | 1533.48  | 13.31    | 18     | 0      | categorical |
| Sex                                      | 1       | 2       | 1.47     | 0.5      | 2      | 0      | categorical |
| State-county recode                      | 2900    | 53073   | 18293.32 | 13211.73 | 614    | 0      | categorical |
| Type of reporting source                 | 1       | 8       | 1.16     | 0.76     | 6      | 0      | categorical |
| Survived cancer for 60 months            | 0       | 1       | 0.16     | 0.37     | 2      | 0      | target      |

Appendix D. - Attribute Importance

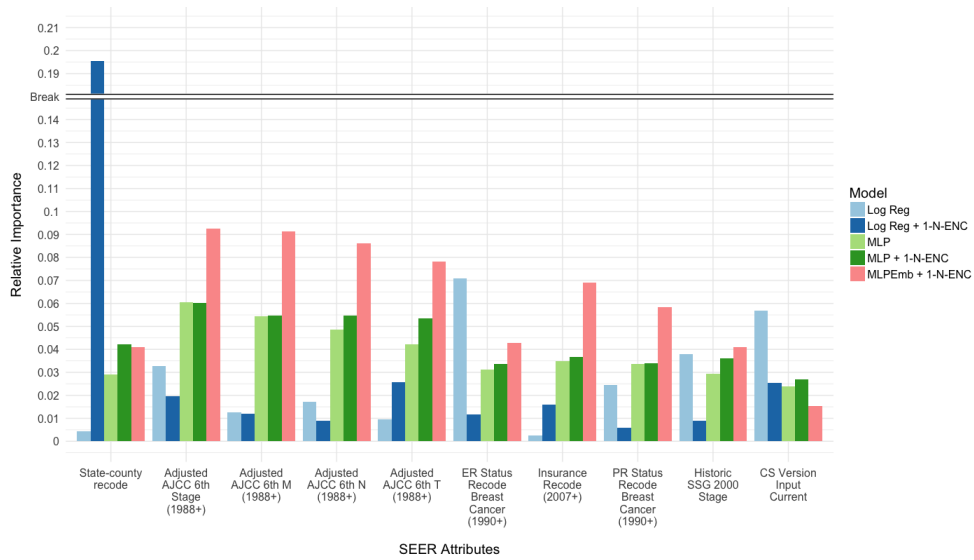

Figure 4: Relative attribute importance for 1-year survival prediction of breast cancer.

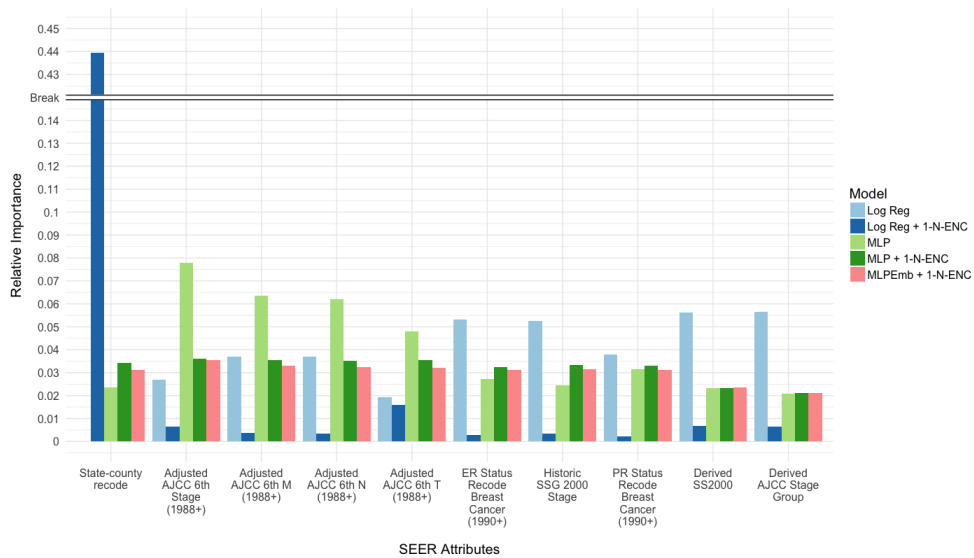

Figure 5: Relative attribute importance for 5-year survival prediction of breast cancer.

REPRODUCIBLE SURVIVAL PREDICTION WITH SEER CANCER DATA

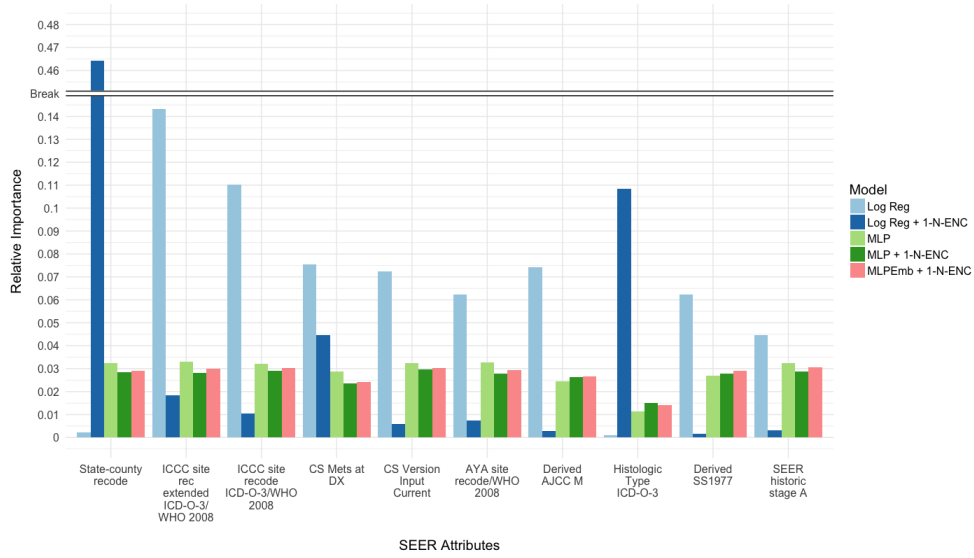

Figure 6: Relative attribute importance for 1-year survival prediction of lung cancer.

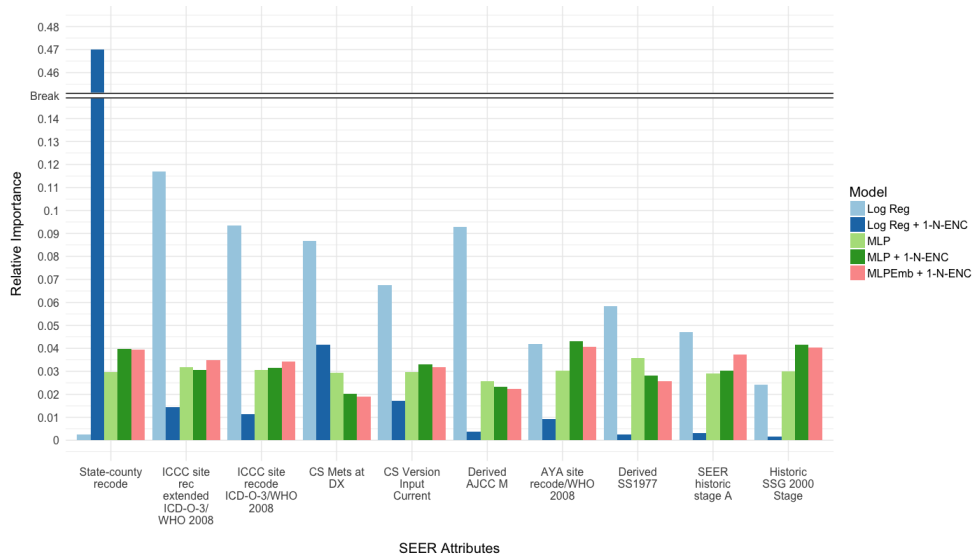

Figure 7: Relative attribute importance for 5-year survival prediction of lung cancer.



## Appendix E. - Github Readme File

### MLHC 2018 - Reproducible Survival Prediction with SEER Cancer Data

(<https://github.com/stefanhgm/MLHC2018-reproducible-survival-seer>)

This repository contains the code that was used for experiments reported in *Reproducible Survival Prediction with SEER Cancer Data* submitted to the Machine Learning for Healthcare 2018 conference.

Repository overview:

- **/bin/cluster**: Slurm submission scripts for all parameter tuning experiments on the HPC cluster.
- **/cohort**: SEER\*Stat session files to reproduce cohort selections.
- **/example**: Randomly generated SEER example to test the software without sensitive data.
- **/example/CASES.csv**: Example case export. To reproduce experiments, this should be generated for each cohort by loading the provided session files into SEER\*Stat, executing the case listing, and exporting it via Matrix→Export→Results as Text File... with "CSV Defaults".
- **/example/INCIDENCES.txt**: Example SEER incidences. To reproduce experiments, this should contain all incidences provided by SEER 1973-2014 data (November 2016 submission) in ASCII format (e.g. by merging them into a single file). The according ASCII data files are available from SEER on request.
- **/lib**: Python classes and functions used for the experiments.
- **main.py**: Main routine to perform the experiments.
- **requirements.txt**: Python dependencies (can be installed with pip, e.g. in a virtual environment).

To execute main.py and reproduce our experiments Python3 (we used version 3.5.2) is necessary and all dependencies in requirements.txt must be satisfied. The easiest way would be to setup an according virtual environment and to install requirements with pip (<https://docs.python.org/3/tutorial/venv.html>).

The option -h gives an overview of all command line arguments. Note that this code provides some additional functionality such as SVM models and survival regression that were not used for the paper's experiments.

```
$ python main.py -h
```

An experiment with the randomly generated examples and an MLP model can be performed as shown below. This will produce a folder in the current directory containing results and a plot for the AUC score.

```
$ python main.py --incidences example/INCIDENCES.txt --specifications example/read.seer.
  research.nov2016.sas --cases example/CASES.csv --task survival60 --oneHotEncoding --
  model MLP --mlpLayers 2 --mlpWidth 20 --mlpEpochs 1 --mlpDropout 0.1 --importance --
  plotData --plotResults
```

```
[...]
```

```
Raw data: (10000; 133) cases and attributes
```

```
Filtered SEER*Stat cases from ASCII: (5000; 133) cases and attributes
```

```
Remove irrelevant, combined, post-diagnosis, and treatment attributes: (5000; 960) cases
  and attributes
```

```
Create target label indicating cancer survival for survival60: (2831; 959) cases and
  attributes
```

```
Remove inputs with constant values: (2831; 925) cases and attributes
```

```
Data: (2831, 925) -> x:(2831, 924), y:(2831,)
```

```
Train: x:(2264, 924), y:(2264,)
```

```
Valid: x:(283, 924), y:(283,)
```

```
Test: x:(284, 924), y:(284,)
```

```
Train on 2264 samples, validate on 283 samples
```

```
Epoch 1/1
```

```
- 1s - loss: 0.4241 - acc: 0.8913 - val_loss: 0.2623 - val_acc: 0.9293
```

```
Validation results: auc = 0.48878326996197724, f1 = 0.9633699633699635, acc =
  0.9293286219081273
```
